# Supplementary material for: The use of diversity indices for local assessment of marine sediment quality
Source: Research Square preprint supplement (doi:10.21203/rs.3.rs-279143/v1), 2021-03-04
Supplement: Supplementary file 1 [file b2929f16720515faa91084a9.xlsx]

## Sheet: TableS1
Table S1	Accepted candidate models for the observed number of families analysed by using a generalised linear mixed model. This analysis is for the regional dataset.
	Intercept	Sample size	Latitude	Depth	WC	D50	TOC	TOC×C/N	Sediment temperature	σ	AIC	Δi	exp(-Δi/2)	wi
Best model	2.29671				-0.330033					0.633709	201.409	0	1	0.0912502
	2.29964				-0.337154				-0.1107	0.615804	201.817	0.408198	0.815382	0.0744037
	2.29938		0.110322		-0.329126					0.616716	201.883	0.474726	0.788705	0.0719695
	2.29623				-0.428526		0.143416			0.624525	201.921	0.511752	0.774238	0.0706494
	2.29884				-0.417564		0.118512		-0.0938643	0.610914	202.798	1.3895	0.499199	0.045552
	2.2986		0.0929016		-0.410956		0.118829			0.611608	202.863	1.45447	0.483244	0.0440961
	2.2963			0.063774	-0.345032					0.631966	202.929	1.51996	0.467677	0.0426756
	2.26443	-0.171655			-0.338624					0.630453	203.009	1.60017	0.449291	0.0409979
	2.29657				-0.330722			0.00555392		0.633845	203.405	1.99605	0.368606	0.0336354
	2.29593			0.0564712	-0.438645		0.138744			0.623406	203.537	2.12854	0.34498	0.0314795
	2.27996	-0.103942			-0.3418				-0.1036	0.61502	203.671	2.26184	0.322736	0.0294497
	2.29897		0.101377	0.0382775	-0.338238					0.617082	203.714	2.30502	0.315843	0.0288207
	2.27442	-0.116258			-0.428141		0.134308			0.622922	203.739	2.33058	0.311832	0.0284548
	2.2993			0.0237247	-0.342214				-0.102298	0.616528	203.757	2.34855	0.309043	0.0282002
	2.29948				-0.338771			0.0126771	-0.111585	0.616058	203.796	2.3868	0.303189	0.027666
	2.29164	-0.040561	0.104774		-0.331172					0.616829	203.864	2.45544	0.292959	0.0267326
	2.2993		0.110364		-0.329825			0.0056778		0.616875	203.879	2.47042	0.290774	0.0265331
	2.26977	-0.141676		0.054711	-0.349995					0.629554	204.665	3.25649	0.196274	0.01791
	2.2985			0.0240489	-0.422853		0.118755		-0.0853006	0.611711	204.736	3.32753	0.189425	0.0172851
	2.28645	-0.0655289			-0.417732		0.114392		-0.0899663	0.610588	204.741	3.33192	0.189009	0.0172471
	2.29706	-0.0076562	0.0917644		-0.411118		0.118488			0.611571	204.863	3.45376	0.177838	0.0162278
	2.29622			0.0639198	-0.345879			0.00657398		0.632169	204.923	3.5144	0.172527	0.0157431
	2.26444	-0.171292			-0.339043			0.00356639		0.630562	205.007	3.59853	0.165421	0.0150947
	2.27931	-0.0889985		0.0511154	-0.437332		0.132191			0.622275	205.435	4.02583	0.133599	0.0121909
	2.28089	-0.0975111		0.0195441	-0.34569				-0.0971163	0.615668	205.631	4.22182	0.121128	0.0110529
	2.28014	-0.102236			-0.343139			0.0110327	-0.104484	0.615254	205.654	4.24565	0.119693	0.010922
	2.29344	-0.0290165	0.0976218	0.037367	-0.339484					0.617153	205.704	4.29526	0.11676	0.0106544
	2.29889		0.101395	0.0383892	-0.339034			0.00625322		0.617264	205.709	4.29981	0.116495	0.0106302
	2.29914			0.0236163	-0.343784			0.0125097	-0.103221	0.616769	205.737	4.32776	0.114879	0.0104827
	2.2917	-0.0398665	0.104905		-0.331776			0.00520838		0.616973	205.861	4.45183	0.107969	0.00985215
	2.29607					0.25413				0.6686	206.474	5.06544	0.0794426	0.00724916
	2.26981	-0.141118		0.0548306	-0.350568			0.00477358		0.629707	206.662	5.25355	0.0723114	0.00659843
	2.28753	-0.0581528		0.0215112	-0.422461		0.11508		-0.0827483	0.611313	206.692	5.28296	0.0712558	0.00650211
	2.29831		0.0950915			0.249278				0.655407	207.444	6.03548	0.0489117	0.00446321
	2.29843					0.256936			-0.0929834	0.655493	207.45	6.04075	0.0487829	0.00445145
	2.28107	-0.0958299		0.0195105	-0.347019			0.0109914	-0.0980105	0.615898	207.615	6.20577	0.0449193	0.0040989
	2.29352	-0.028184	0.0977442	0.0375023	-0.340202			0.00590288		0.617318	207.699	6.29062	0.0430535	0.00392864
	2.29579			0.0397257		0.262258				0.668478	208.303	6.8942	0.0318378	0.00290521
	2.29644					0.253683		-0.0266606		0.66709	208.39	6.98124	0.030482	0.00278149
	2.28388	-0.0649154				0.255451				0.667997	208.421	7.0127	0.0300062	0.00273807
	2.296					0.266291	0.0202795			0.668552	208.443	7.03399	0.0296884	0.00270908
	2.29868		0.0950151			0.248754		-0.0266072		0.653888	209.358	7.94875	0.018791	0.00171469
	2.29871					0.256521		-0.0215316	-0.0917001	0.654393	209.393	7.98445	0.0184586	0.00168435
	2.31015	0.061964	0.103609			0.247598				0.654756	209.402	7.99371	0.0183733	0.00167657
	2.29813		0.091172	0.0160828		0.252753				0.655938	209.417	8.00838	0.0182391	0.00166432
	2.29836		0.0961559			0.245715	-0.00583766			0.655287	209.442	8.03292	0.0180167	0.00164402
	2.29847					0.254019	-0.00489737		-0.0938353	0.655378	209.448	8.03894	0.0179624	0.00163908
	2.29838			0.00307223		0.257533			-0.0918644	0.655644	209.449	8.03985	0.0179543	0.00163833
	2.29766	-0.00408131				0.257009			-0.092696	0.655498	209.449	8.04054	0.0179481	0.00163777
	2.29618			0.0398394		0.261834		-0.0269079		0.666944	210.217	8.80843	0.0122257	0.0011156
	2.28783	-0.0425817		0.036739		0.262525				0.668113	210.281	8.87226	0.0118417	0.00108055
	2.29576			0.0384162		0.271381	0.0156493			0.668468	210.284	8.87565	0.0118216	0.00107873
	2.28352	-0.0689212				0.255064		-0.0278229		0.666409	210.33	8.92113	0.0115558	0.00105447
	2.28557	-0.0556803				0.264073	0.0146817			0.668076	210.406	8.99721	0.0111245	0.00101511
	2.30958	0.0570915	0.102859			0.247267		-0.0256656		0.653333	211.322	9.91327	0.00703655	0.000642086
	2.29847	0	0.0910171	0.0162368		0.25235		-0.0267424		0.65438	211.33	9.92102	0.00700934	0.000639604
	2.31114	0.0683791	0.0999421	0.0185799		0.251485				0.65526	211.367	9.95787	0.00688139	0.000627928
	2.29865			0.0037767		0.257237		-0.0216073	-0.0903324	0.654573	211.392	9.98308	0.0067952	0.000620063
	2.2971	-0.00848327				0.256652		-0.021682	-0.0911054	0.654397	211.392	9.98355	0.00679359	0.000619916
	2.31	0.0611442	0.103822			0.246533	-0.00178184			0.654725	211.402	9.99348	0.00675995	0.000616846
	2.29817		0.0923201	0.0163483		0.248704	-0.0067869			0.655782	211.414	10.0049	0.00672137	0.000613326
	2.29842			0.00316798		0.254589	-0.00497659		-0.0926947	0.655532	211.447	10.038	0.00661118	0.000603272
	2.29716	-0.00692124				0.253791	-0.0054895		-0.0934513	0.655373	211.447	10.0384	0.0066099	0.000603154
	2.29782	-0.00298091		0.00292618		0.257558			-0.0917078	0.655641	211.449	10.0397	0.00660538	0.000602742
	2.29513						-0.137309			0.704118	211.588	10.1791	0.00616091	0.000562184
	2.29404									0.720247	211.59	10.1816	0.00615298	0.00056146
	2.29832		0.128738				-0.156368			0.683601	211.878	10.4696	0.00532779	0.000486162
	2.28739	-0.0470248		0.036538		0.262106	0	-0.0276841		0.666494	212.19	10.7816	0.00455824	0.000415941
	2.29803						-0.158997		-0.112549	0.68703	212.26	10.8514	0.00440188	0.000401672
	2.28914	-0.0353906		0.0361977		0.269679	0.0123606			0.668164	212.27	10.8613	0.00438021	0.000399695
	2.29642		0.102735							0.706069	212.526	11.1174	0.00385371	0.000351652
	2.29591								-0.0798395	0.710472	212.927	11.5183	0.0031538	0.000287785
	2.31064	0.0638425	0.0992448	0.0185566		0.251127		-0.0256805		0.653846	213.286	11.8774	0.00263541	0.000240481
	2.29462						-0.163646	0.0528542		0.704061	213.361	11.9518	0.00253916	0.000231699
	2.31099	0.0675132	0.100238	0.0186482		0.250027	-0.00246375			0.655233	213.366	11.9574	0.00253207	0.000231052
	2.29729	-0.00720849		0.00343004		0.257295		-0.0217492	-0.0899425	0.654561	213.391	11.9824	0.00250061	0.000228181
	2.27265	-0.120153					-0.146615			0.702379	213.429	12.02	0.00245411	0.000223938
	2.29733	-0.00581086		0.00289107		0.254344	-0.00547019		-0.0924738	0.655513	213.446	12.0376	0.0024326	0.000221975
	2.29443							-0.0282457		0.718589	213.508	12.0992	0.00235882	0.000215243
	2.29781		0.134421				-0.189971	0.0658152		0.682677	213.511	12.1024	0.00235508	0.000214902
	2.29503			0.0146869			-0.140208			0.704263	213.566	12.1575	0.00229103	0.000209057
	2.29415			-0.0135142						0.719779	213.572	12.1633	0.00228436	0.000208449
	2.29154	-0.0133351								0.720182	213.588	12.1796	0.00226581	0.000206755
	2.29756						-0.200277	0.0779853	-0.125489	0.68506	213.761	12.3522	0.00207855	0.000189668
	2.29848		0.131662	-0.013851			-0.154034			0.68298	213.859	12.4504	0.00197895	0.000180579
	2.3048	0.0341093	0.133052				-0.15438			0.683396	213.867	12.4582	0.00197126	0.000179877
	2.2985			-0.029948			-0.155039		-0.122978	0.685119	214.179	12.7698	0.00168687	0.000153927
	2.28649	-0.0614902					-0.163053		-0.109058	0.686666	214.218	12.8095	0.00165366	0.000150897
	2.32133	0.1309	0.120474							0.704195	214.36	12.9509	0.00154082	0.0001406
	2.297		0.112523	-0.04059						0.703205	214.365	12.9562	0.00153676	0.00014023
	2.29682		0.102714					-0.0284979		0.704336	214.44	13.0308	0.00148049	0.000135095
	2.29683			-0.0523449					-0.0995519	0.706124	214.687	13.278	0.00130831	0.000119384
	2.29621							-0.0239922	-0.0784967	0.709158	214.866	13.4577	0.00119589	0.000109125
	2.30345	0.0399615							-0.0826476	0.710317	214.91	13.5008	0.00117039	0.000106798
	2.26985	-0.132338					-0.175746	0.0565474		0.702141	215.169	13.7604	0.00102794	9.37998e-05
	2.29446			0.0200879			-0.168819	0.0552807		0.704257	215.321	13.912	0.000952906	8.69528e-05
	2.27339	-0.116118		0.00793483			-0.147882			0.702506	215.423	14.0139	0.000905589	8.26351e-05
	2.29455			-0.0133412				-0.028155		0.718128	215.49	14.0813	0.00087556	7.9895e-05
	2.29791		0.136137	-0.00847767			-0.188083	0.0649806		0.682294	215.504	14.0952	0.000869502	7.93422e-05
	2.29106	-0.0180251						-0.0285657		0.718478	215.504	14.0955	0.000869342	7.93276e-05
	2.30257	0.0251481	0.137592				-0.188341	0.0654185		0.682528	215.505	14.0959	0.000869188	7.93135e-05
	2.28985	-0.0231067		-0.0151836						0.719603	215.566	14.1576	0.000842771	7.6903e-05
	2.29801			-0.0266441			-0.196076	0.076603	-0.134528	0.683405	215.696	14.2874	0.000789838	7.20728e-05
	2.28406	-0.0717599					-0.205702	0.0792399	-0.121594	0.684585	215.704	14.2954	0.000786654	7.17823e-05
	2.30415	0.0299232	0.135246	-0.0129018			-0.152451			0.682842	215.85	14.4416	0.000731206	6.67226e-05
	2.28484	-0.0727717		-0.0330075			-0.159431		-0.119873	0.684493	216.12	14.7115	0.000638896	5.82994e-05
	2.31902	0.116009	0.127105	-0.0358291						0.701818	216.236	14.8272	0.000602998	5.50237e-05
	2.29739		0.112435	-0.0403596				-0.028208		0.701515	216.279	14.8706	0.000590047	5.38419e-05
	2.32069	0.12598	0.119819					-0.0262888		0.702753	216.286	14.877	0.000588172	5.36708e-05
	2.29711			-0.0515621				-0.0225647	-0.0979901	0.704961	216.633	15.2239	0.000494495	4.51227e-05
	2.30016	0.0183395		-0.0514307					-0.100537	0.706204	216.683	15.2743	0.0004822	4.40009e-05
	2.30283	0.0350956						-0.0232283	-0.081004	0.709069	216.853	15.4443	0.000442908	4.04155e-05
	2.27098	-0.125658		0.013066			-0.1785	0.057964		0.702381	217.153	15.744	0.000381267	3.47907e-05
	2.28931	-0.0281072		-0.0153608				-0.0286424		0.717891	217.482	16.073	0.000323445	2.95144e-05
	2.30237	0.0233775	0.138918	-0.00777649			-0.186699	0.0646778		0.682242	217.499	16.0899	0.000320712	2.9265e-05
	2.2827	-0.0815176		-0.0300203			-0.201627	0.0777905	-0.13122	0.682685	217.623	16.2141	0.000301401	2.75029e-05
	2.31837	0.11068	0.126353	-0.0358103				-0.026309		0.700364	218.162	16.7528	0.000230239	2.10094e-05
	2.29977	0.0141542		-0.0508446				-0.0222768	-0.0987309	0.704979	218.631	17.2218	0.000182111	1.66177e-05
												Sum	10.9589
	Δi = AICi − AICmin
	wi = exp(-Δi/2)/Σexp(-Δ/2)

## Sheet: TableS2
Table S2	Accepted candidate models for the inverse Simpson's concentration index in the regional dataset analysed by using a linear model.
Analysis of all data															Analysis of reliable data
	Intercept	Sample size	Latitude	Depth	WC	D50	TOC	TOC×C/N	Sediment temperature	AICc	Δi	exp(-Δi/2)	wi			Intercept	Sample size	Latitude	Depth	WC	D50	TOC	TOC×C/N	Sediment temperature	AICc	Δi	exp(-Δi/2)	wi
Best model	3.89326	-2.36183			-1.29735					320.886	0	1	0.0947663		Best model	4.24325	-3.52618			-1.72797					182.541	0	1	0.141746
	3.94393	-2.09311			-1.32516				-0.461743	321.313	0.427831	0.807416	0.0765158			4.38701	-2.68165	0.747709		-1.64398					182.691	0.149318	0.92806	0.131549
	3.99306	-1.83251	0.443396		-1.28046					321.658	0.772906	0.679463	0.0643901			4.84347		1.06008		-1.51465					183.289	0.747538	0.688136	0.0975404
	4.33858		0.681099		-1.20319					322.143	1.25733	0.533304	0.0505392			4.27492	-3.34015			-1.68303				-0.545558	183.653	1.11159	0.573617	0.0813078
	3.90944	-2.27604		0.182925	-1.33884					322.885	1.99934	0.368001	0.0348741			4.2644	-3.40194			-1.85381			0.242739		184.889	2.34736	0.309227	0.0438316
	3.90372	-2.30638			-1.38847		0.140965			323.062	2.17688	0.336741	0.0319117			4.24669	-3.50599		0.0835066	-1.73868					185.049	2.50777	0.285394	0.0404534
	4.33858				-1.24441				-0.595055	323.119	2.23352	0.327339	0.0310207			4.39825	-2.61557	0.733501		-1.72875			0.160446		185.311	2.76992	0.250333	0.0354837
	3.8934	-2.3611			-1.29806			0.00744571		323.158	2.27273	0.320983	0.0304184			4.38894	-2.67031	0.783937	-0.122346	-1.62421					185.332	2.79009	0.247821	0.0351277
	3.96047	-2.00537				1.16769				323.45	2.56405	0.277475	0.0262953			4.84347		1.01919		-1.67884			0.299481		185.538	2.99626	0.223547	0.0316869
	3.94521	-2.08631			-1.32978			0.046106	-0.465704	323.644	2.75894	0.251712	0.0238538			4.84347		1.10198	-0.146863	-1.49158					185.738	3.19676	0.202224	0.0286643
	3.94688	-2.07744			-1.3559		0.0480753		-0.456186	323.652	2.76686	0.250717	0.0237595			4.84347				-1.58528					185.798	3.257	0.196224	0.0278139
	3.94526	-2.08605		0.0256372	-1.33046				-0.453227	323.659	2.77323	0.24992	0.023684			4.27179	-3.35853		-0.229303	-1.64465				-0.654252	186.165	3.62331	0.163384	0.023159
	4.33858				-1.19333					323.883	2.99705	0.22346	0.0211765			4.28348	-3.28985			-1.74222			0.11111	-0.526272	186.323	3.78111	0.150988	0.0214019
	3.99832	-1.80465	0.422995	0.111339	-1.30649					323.908	3.02271	0.220611	0.0209065			4.84347				-1.53981				-0.66305	186.348	3.80698	0.149047	0.0211268
	3.99597	-1.81713	0.436217		-1.32011		0.0609142			323.991	3.10519	0.211698	0.0200618			4.84347		0.989981			1.22712				186.888	4.34632	0.113817	0.0161332
	4.33858		0.617101			1.11139				323.993	3.10775	0.211427	0.0200362			4.84347				-1.85203			0.494775		187.467	4.92578	0.0851885	0.0120751
	3.99341	-1.83068	0.443702		-1.28188			0.0151111		324.007	3.12113	0.210018	0.0199026			4.26688	-3.38737		0.0713162	-1.86025			0.23751		187.575	5.03326	0.0807312	0.0114433
	4.33858		0.647061	0.157808	-1.24176					324.221	3.33568	0.188654	0.017878			4.37474	-2.75372				1.34324				187.604	5.06252	0.0795586	0.0112771
	4.00841	-1.75111				1.18246			-0.422966	324.235	3.34913	0.187389	0.0177582			4.51571	-1.92551	0.769728			1.24255				187.961	5.41953	0.0665526	0.00943355
	4.33858		0.660095		-1.29544		0.139441			324.325	3.43909	0.179147	0.0169771			4.84347			0.172233	-1.60906					188.066	5.52411	0.0631618	0.00895293
	4.33858		0.681258		-1.20675			0.0357578		324.405	3.51947	0.172091	0.0163084			4.40062	-2.60164	0.770764	-0.127387	-1.7109			0.165606		188.133	5.59168	0.0610635	0.0086555
	4.0543	-1.50774	0.419299			1.14257				324.438	3.55292	0.169237	0.0160379			4.84347		1.06267	-0.154982	-1.65744			0.304858		188.145	5.60375	0.0606963	0.00860344
	4.33858					1.161			-0.539349	324.753	3.86768	0.144592	0.0137024			4.84347					1.36508				188.363	5.82158	0.0544326	0.00771559
	4.33858					1.13725				324.951	4.06537	0.130983	0.0124128			4.84347				-1.72498			0.335372	-0.599497	188.561	6.01961	0.0493012	0.00698824
	3.91931	-2.22366		0.180654	-1.42616		0.135875			325.145	4.25978	0.11885	0.011263			4.84347			-0.193119	-1.50683				-0.755136	188.767	6.22593	0.044469	0.00630329
	3.9097	-2.27466		0.183285	-1.3401			0.0123749		325.234	4.34826	0.113707	0.0107756			4.40357	-2.58435				1.29054			-0.561011	188.837	6.29527	0.0429536	0.0060885
	4.33858				-1.36116		0.179055		-0.570637	325.242	4.35695	0.113214	0.0107289			4.84347		1.08602	-0.341661		1.21182				188.968	6.42696	0.0402165	0.00570052
	4.33858			0.0992371	-1.26599				-0.56035	325.323	4.43727	0.108757	0.0103065			4.27958	-3.31272		-0.22519	-1.69886			0.100461	-0.634865	189.028	6.48692	0.0390287	0.00553215
	4.33858				-1.25276			0.0788046	-0.601084	325.34	4.45399	0.107852	0.0102207			4.84347		1.05666			1.03273	-0.322847			189.149	6.60726	0.0367495	0.00520909
	4.33858			0.306449	-1.26917					325.352	4.46625	0.107193	0.0101583			4.84347					1.30312			-0.643106	189.153	6.61186	0.0366651	0.00519713
	3.97443	-1.93136		0.139682		1.19768				325.569	4.68313	0.096177	0.00911433			4.38006	-2.72247	0.992648				-1.14197			189.276	6.7344	0.034486	0.00488824
	3.95758	-2.0207				1.16763		-0.113321		325.613	4.72719	0.0940815	0.00891575			4.84347		1.01282			1.16692		-0.144484		189.355	6.81398	0.0331408	0.00469757
	4.33858				-1.40382		0.317123			325.617	4.73156	0.093876	0.00889628			4.84347		1.27649				-0.941884			189.358	6.81636	0.0331014	0.00469198
	3.94889	-2.06681				1.10471	-0.107679			325.662	4.77636	0.0917965	0.00869921			4.31142	-3.12571				1.09551	-0.426964			189.693	7.15114	0.0279994	0.0039688
	3.94654	-2.07926		0.0255988	-1.33507			0.0460885	-0.457199	326.071	5.18539	0.0748181	0.00709024			4.22642	-3.62508					-1.2597		-0.882449	189.753	7.21182	0.0271627	0.0038502
	4.33858				-1.19658			0.032699		326.074	5.18821	0.0747126	0.00708023			4.4432	-2.35152	0.839876			0.899396	-0.575594			189.812	7.27094	0.0263715	0.00373805
	3.94835	-2.06966		0.0269377	-1.36217		0.0491638		-0.447112	326.078	5.1928	0.0745414	0.00706401			4.84347			0.141385	-1.86481			0.482268		189.926	7.38463	0.0249143	0.0035315
	4.33858		0.590426	0.1165		1.13846				326.163	5.27715	0.0714631	0.00677229			4.34604	-2.92232				1.25241		-0.22679		189.976	7.43421	0.0243042	0.00344502
	4.33858		0.616865			1.11119		-0.0813752		326.21	5.32459	0.069788	0.00661355			4.36841	-2.79092		-0.127323		1.34224				190.077	7.53598	0.0230985	0.00327411
	4.33858		0.633375			1.05861	-0.0877772			326.226	5.34073	0.0692268	0.00656037			4.51639	-1.92153	0.865591	-0.339429		1.22732				190.198	7.65655	0.0217471	0.00308255
	4.00126	-1.78906	0.415706	0.111544	-1.34659		0.0615352			326.321	5.43564	0.0660186	0.00625634			4.20093	-3.77482					-1.11104			190.237	7.69534	0.0213294	0.00302336
	3.99875	-1.80238	0.423268	0.111809	-1.30828			0.017765		326.337	5.45118	0.0655075	0.0062079			4.84347		1.16099							190.276	7.73422	0.0209188	0.00296515
	3.98974	-1.85014				1.0652	-0.202104		-0.450041	326.371	5.48579	0.0643836	0.00610139			4.48242	-2.12109	0.79464			1.11947		-0.299131		190.361	7.81925	0.020048	0.00284172
	4.33858	0	0.626279	0.157366	-1.33334		0.138606			326.481	5.59533	0.0609522	0.00577621			4.3104	-3.13167				0.883012	-0.678745		-0.706911	190.443	7.90193	0.0192361	0.00272664
	4.0056	-1.76602				1.18218		-0.0813929	-0.416467	326.527	5.64169	0.0595556	0.00564387			4.39089	-2.65883		-0.4909		1.2652			-0.789382	190.728	8.18655	0.0166845	0.00236495
	4.33858		0.647039	0.158714	-1.24586			0.039072		326.558	5.67269	0.0586395	0.00555704			4.84347			-0.0423179		1.36484				190.743	8.20112	0.0165634	0.00234779
	4.00778	-1.75449		-0.0103385		1.18036			-0.426456	326.584	5.69866	0.0578832	0.00548538			4.84347					1.38144		0.0414602		190.744	8.20242	0.0165526	0.00234627
	4.0396	-1.58568	0.443884			1.03128	-0.187752			326.604	5.71861	0.0573087	0.00543093			4.84347					1.36274	-0.00407494			190.749	8.20791	0.0165073	0.00233984
	4.33858			0.258497		1.19483				326.634	5.74835	0.0564628	0.00535077			4.84347			-0.437579		1.28086			-0.848781	191.093	8.55151	0.0139016	0.00197049
	4.05106	-1.52494	0.416738			1.14266		-0.104714		326.693	5.80738	0.0548205	0.00519513			4.36136	-2.83231				1.14137		-0.358188	-0.621703	191.124	8.58289	0.0136852	0.00193982
	4.0583	-1.48654	0.4062	0.0693563		1.15824				326.751	5.86574	0.0532441	0.00504574			4.84347			-0.181298	-1.68997			0.328054	-0.687334	191.163	8.62151	0.0134234	0.00190271
	4.33858			0.0636254		1.17417			-0.51649	326.998	6.11292	0.0470539	0.00445912			4.84347		1.2236					-0.62608		191.232	8.69048	0.0129684	0.00183822
	4.33858					1.16074		-0.0469511	-0.536172	327.008	6.12244	0.0468304	0.00443794			4.84347		1.12779	-0.302756		1.0599	-0.255212			191.508	8.96609	0.011299	0.00160158
	4.33858					1.13333	-0.0472138		-0.547212	327.015	6.12928	0.0466707	0.00442281			4.84347					1.15155	-0.254101		-0.704235	191.535	8.99394	0.0111427	0.00157943
	4.33858					1.13703		-0.0831625		327.095	6.20917	0.0448431	0.00424961			4.53388	-1.8188	0.95497							191.552	9.01027	0.0110521	0.00156659
	4.33858					1.19257	0.0932047			327.105	6.21963	0.0446091	0.00422744			4.84347		1.10002	-0.331		1.16748		-0.107572		191.638	9.09631	0.0105867	0.00150062
	4.33858			0.295215	-1.4645		0.29848			327.209	6.32369	0.0423475	0.00401312			4.84347					1.25866		-0.107637	-0.663711	191.656	9.11488	0.0104889	0.00148675
	4.33858			0.101901	-1.3848		0.181317		-0.534692	327.519	6.63383	0.0362645	0.00343665			4.84347		1.3365	-0.236239			-0.901817			191.7	9.15807	0.0102648	0.00145499
	4.33858			0.307357	-1.27331			0.0394146		327.612	6.72665	0.0346199	0.0032808			4.38512	-2.69272	1.04584	-0.197185			-1.10634			191.837	9.29568	0.00958227	0.00135825
	4.33858			0.0987651	-1.27418			0.0783103	-0.566506	327.621	6.73541	0.0344687	0.00326647			4.44286	-2.35354	0.971997					-0.775948		191.903	9.36174	0.00927096	0.00131412
	3.97149	-1.94694		0.139003		1.19747		-0.112548		327.81	6.92457	0.031358	0.00297168			4.22219	-3.6499		-0.412949			-1.21238		-1.06506	191.907	9.36565	0.00925284	0.00131155
	3.96241	-1.9951		0.143963		1.13094	-0.115687			327.849	6.96308	0.03076	0.00291501			4.35736	-2.85583								192.029	9.48719	0.0087073	0.00123422
	4.33858		0.590126	0.116776		1.13832		-0.0817285		328.456	7.57047	0.0227036	0.00215153			4.84347		1.27071	-0.399203						192.126	9.58431	0.00829455	0.00117572
	4.33858		0.60701	0.11908		1.08336	-0.0926319			328.468	7.5826	0.0225663	0.00213852			4.84347						-0.958224		-0.944102	192.188	9.64657	0.00804033	0.00113968
	3.98894	-1.85437	0	-0.0126606		1.06251	-0.202302		-0.454341	328.802	7.91598	0.0191015	0.00181018			4.31103	-3.128		-0.0564611		1.10452	-0.410658			192.39	9.84818	0.00726935	0.0010304
	4.33858		0	0.258705		1.19466		-0.0837736		328.85	7.96419	0.0186465	0.00176706			4.45174	-2.30133	0.905814	-0.260954		0.925661	-0.511902			192.434	9.89285	0.00710877	0.00100764
	4.33858		0	0.25376		1.23343	0.0668048			328.884	7.99812	0.0183329	0.00173734			4.26558	-3.39497						-0.756196		192.502	9.96005	0.00687388	0.000974344
	4.00509	-1.76871	0	-0.00830558		1.1805		-0.0812231	-0.419284	328.958	8.07252	0.0176634	0.00167389			4.84347									192.597	10.0558	0.00655246	0.000928784
	4.04364	-1.56428	0.430464	0.0721634		1.04665	-0.189345			328.995	8.10928	0.0173418	0.00164341			4.34277	-2.94153		-0.103287		1.2575		-0.212039		192.642	10.1004	0.00640802	0.00090831
	4.05505	-1.50378	0.403679	0.0691618		1.15829		-0.1046		329.087	8.2014	0.016561	0.00156943			4.30715	-3.15081		-0.432764		0.895311	-0.621058		-0.895836	192.694	10.1524	0.00624362	0.000885007
	4.33858			0.0652036		1.17422		-0.0486952	-0.512628	329.329	8.44335	0.014674	0.0013906			4.29432	-3.22614						-0.864298	-0.795709	192.735	10.1932	0.00611749	0.000867129
	4.33858			0.0640736		1.14612	-0.0480064		-0.524324	329.337	8.45118	0.0146167	0.00138517			4.20233	-3.7666		0.0608546			-1.12255			192.763	10.2219	0.00603022	0.000854758
	4.33858		0.782218				-0.739953			329.69	8.8046	0.0122491	0.00116081			4.39331	-2.64463							-0.683395	192.788	10.2461	0.00595778	0.00084449
	3.89447	-2.35541					-0.784141			329.779	8.89359	0.0117161	0.00111029			4.84347						-0.785353			192.825	10.2833	0.00584789	0.000828914
	4.01644	-1.70855	0.573904				-0.829533			329.86	8.97494	0.0112491	0.00106603			4.48716	-2.09325	0.880031	-0.31325		1.12063		-0.262168		192.856	10.315	0.00575621	0.000815918
	3.94336	-2.09614					-0.864353		-0.514031	330.097	9.21162	0.00999361	0.000947057			4.84347								-0.768645	192.912	10.3706	0.00559814	0.000793514
	4.33858		0.813176				-0.926242	0.370106		331.154	10.2684	0.00589165	0.00055833			4.35166	-2.8893		-0.475788		1.12596		-0.336234	-0.839324	193.245	10.7037	0.00473947	0.0006718
	3.93362	-2.1478					-1.11068	0.465619	-0.589342	331.162	10.2766	0.00586754	0.000556044			4.84347			-0.0489715		1.38426		0.0492901		193.275	10.7338	0.00466858	0.000661752
	4.00797	-1.75346	0.601402				-1.03031	0.394219		331.263	10.3772	0.00557976	0.000528773			4.84347			-0.0440752		1.36993	0.0088953			193.283	10.7413	0.00465121	0.000659289
	3.88185	-2.42233					-0.959253	0.347585		331.337	10.4517	0.00537586	0.00050945			4.84347		1.31044	-0.329234				-0.589595		193.399	10.8571	0.00438947	0.000622189
	4.33858						-0.735764		-0.629744	331.34	10.454	0.00536952	0.00050885			4.53441	-1.81568	1.06466	-0.39779						193.543	11.0013	0.00408403	0.000578894
	4.33858		0.663674							331.522	10.6365	0.00490124	0.000464472			4.84347			-0.416103		1.16496	-0.196139		-0.885871	193.708	11.1669	0.00375964	0.000532914
	4.33858		0.788758	-0.0340278			-0.734209			331.955	11.0695	0.00394724	0.000374065			4.84347			-0.432703		1.24679		-0.0830861	-0.862394	193.78	11.2387	0.00362706	0.00051412
	4.33858						-0.614638			331.98	11.0943	0.00389861	0.000369457			4.84347							-0.63487	-0.864914	193.951	11.4098	0.00332964	0.000471963
	3.99069	-1.84508								331.99	11.104	0.00387966	0.000367661			4.84347							-0.503718		194.027	11.4851	0.00320656	0.000454517
	3.89476	-2.35388		0.00339063			-0.784707			332.052	11.1667	0.00375989	0.000356311			4.4475	-2.32627	1.05657	-0.309586				-0.739904		194.265	11.7238	0.00284589	0.000403393
	4.01234	-1.73029	0.586663	-0.0801841			-0.817137			332.163	11.2777	0.00355696	0.00033708			4.84347			-0.385423			-0.912127		-1.11493	194.307	11.7658	0.00278673	0.000395007
	3.93346	-2.14863		-0.183773			-0.843006		-0.574108	332.22	11.3342	0.00345785	0.000327688			4.35051	-2.89607		-0.138031						194.35	11.8085	0.00272782	0.000386657
	4.33858									332.542	11.6566	0.00294304	0.000278901			4.37873	-2.73029		-0.573684					-0.94747	194.39	11.8484	0.00267389	0.000379013
	4.33858						-0.961522	0.432296	-0.702313	332.563	11.6778	0.00291205	0.000275964			4.84347			-0.519964					-1.01049	194.58	12.0384	0.00243158	0.000344666
	4.10181	-1.25577	0.500017							332.631	11.7458	0.00281472	0.000266741			4.28483	-3.28192		-0.513659				-0.833217	-1.02811	194.641	12.0998	0.00235814	0.000334257
	4.33858								-0.488225	332.986	12.1009	0.00235679	0.000223344			4.84347			-0.0499553						194.835	12.2939	0.00214003	0.00030334
	4.03411	-1.61481							-0.380029	333.173	12.2879	0.0021464	0.000203406			4.26382	-3.40533		-0.0506216				-0.750021		195.033	12.4913	0.00193888	0.000274828
	3.92495	-2.19376		-0.164027			-1.08733	0.457502	-0.64165	333.409	12.5234	0.00190798	0.000180812			4.84347			0.112235			-0.807885			195.17	12.629	0.00180987	0.000256542
	4.33858		0.813604	-0.00233898			-0.925724	0.36986		333.504	12.6187	0.00181923	0.000172402			4.84347			-0.468678				-0.602891	-1.07806	195.89	13.3485	0.001263	0.000179026
	4.33858			-0.109537			-0.721121		-0.667279	333.535	12.65	0.00179101	0.000169727			4.84347			0.0195185				-0.506396		196.412	13.8703	0.000972998	0.000137918
	4.33858		0.698944	-0.160883						333.541	12.6556	0.00178594	0.000169247													Sum	7.05488
	4.33858		0.663421					-0.0841483		333.67	12.7845	0.00167447	0.000158683
	4.00563	-1.76586	0.608666	-0.0477728			-1.02046	0.389367		333.677	12.7916	0.00166857	0.000158124
	3.88472	-2.40712		0.0354894			-0.967212	0.351608		333.678	12.7927	0.0016676	0.000158032
	4.33858						-0.753242	0.282901		333.736	12.8501	0.00162047	0.000153566
	3.97739	-1.91563		-0.126129						334.078	13.1921	0.00136577	0.000129429
	4.33858			0.119799			-0.638549			334.079	13.1938	0.00136458	0.000129316
	3.98779	-1.86051						-0.113985		334.095	13.2095	0.00135392	0.000128306
	4.08791	-1.32949	0.535867	-0.207357						334.603	13.7171	0.00105044	9.95467e-05
	4.33858							-0.0861434		334.62	13.7349	0.00104115	9.86663e-05
	4.33858			-0.00765237						334.672	13.7863	0.00101473	9.6162e-05
	4.0986	-1.27278	0.497487					-0.103694		334.825	13.939	0.000940107	8.90904e-05
	4.33858			-0.0896298			-0.94702	0.427471	-0.732217	334.861	13.9756	0.000923067	8.74756e-05
	4.33858			-0.21695					-0.568146	334.894	14.0087	0.000907932	8.60413e-05
	4.01491	-1.71667		-0.290767					-0.480319	334.913	14.0271	0.000899615	8.52532e-05
	4.33858							-0.0534698	-0.48462	335.166	14.2804	0.000792591	7.51109e-05
	4.03116	-1.63049						-0.0853796	-0.373222	335.393	14.5077	0.000707447	6.70421e-05
	4.33858		0.698624	-0.160566				-0.0835694		335.763	14.8775	0.000588018	5.57242e-05
	4.33858			0.149588			-0.792246	0.30157		335.853	14.9676	0.000562105	5.32686e-05
	3.9744	-1.93151		-0.126773				-0.114674		336.255	15.3696	0.000459765	4.35702e-05
	4.33858			-0.00739867				-0.0861216		336.82	15.9344	0.000346655	3.28512e-05
	4.08467	-1.34664	0.533364	-0.207562				-0.10408		336.872	15.9864	0.000337748	3.20071e-05
	4.33858			-0.215425				-0.0474573	-0.564385	337.151	16.2658	0.000293718	2.78345e-05
	4.01229	-1.73055		-0.288816				-0.079277	-0.473325	337.216	16.3309	0.000284305	2.69425e-05
											Sum	10.5523
	Δi = AICi − AICmin
	wi = exp(-Δi/2)/Σexp(-Δ/2)
	The corrected AIC (AICc) is used because of small number of data.
	Reliable data is defined as a sample size ≥50 individuals

## Sheet: TableS3
Table S3	Accepted candidate models for Pielou evenness in the regional dataset analysed by using a linear model.
Analysis of all data															Analysis of reliable data
	Intercept	Sample size	Latitude	Depth	WC	D50	TOC	TOC×C/N	Sediment temperature	AICc	Δi	exp(-Δi/2)	wi			Intercept	Sample size	Latitude	Depth	WC	D50	TOC	TOC×C/N	Sediment temperature	AICc	Δi	exp(-Δi/2)	wi
Best model	0.709844									-15.3681	0	1	0.0403071		Best model	0.614075	-0.136084			-0.0793485					-21.0411	0	1	0.0825013
	0.709844				-0.0381159					-15.2855	0.0825506	0.959565	0.0386773			0.637239		0.0428049		-0.0709899					-20.9357	0.105446	0.948643	0.0782642
	0.709844					0.0380659				-15.2801	0.0880376	0.956936	0.0385713			0.637239				-0.0738417					-20.917	0.12416	0.939808	0.0775353
	0.709844				-0.0420515				-0.0344917	-14.7848	0.583251	0.747048	0.0301113			0.637239				-0.0711883				-0.0386933	-20.4832	0.557995	0.756542	0.0624156
	0.709844						-0.0316343			-14.6372	0.730884	0.69389	0.0279687			0.616067	-0.124382			-0.0765215				-0.0343181	-20.1205	0.920652	0.631078	0.0520647
	0.709844					0.0404924			-0.0326983	-14.6149	0.753196	0.686192	0.0276584			0.620042	-0.101028	0.0310368		-0.0758621					-19.6581	1.383	0.500824	0.0413187
	0.709844		0.0320098		-0.0403125					-14.5562	0.811876	0.666352	0.0268587			0.637239			0.0223507	-0.076928					-19.1611	1.88005	0.390618	0.0322265
	0.709844						-0.0402241		-0.0386363	-14.4781	0.890043	0.64081	0.0258292			0.614858	-0.131485		0.0190232	-0.0817892					-18.9866	2.05458	0.357975	0.0295334
	0.709844								-0.0296934	-14.4677	0.900418	0.637495	0.0256956			0.637239				-0.0784849			0.00861221		-18.5978	2.44336	0.294735	0.024316
	0.709844		0.0292434							-14.43	0.938132	0.625586	0.0252156			0.637239		0.0397085	0.0108525	-0.0726948					-18.5402	2.50096	0.286367	0.0236256
	0.709844		0.0295949			0.0383372				-14.3381	1.02997	0.597508	0.0240838			0.613942	-0.136866			-0.0785565			-0.00152765		-18.503	2.53814	0.281092	0.0231905
	0.709844		0.0370182				-0.0390118			-14.3261	1.04197	0.593934	0.0239397			0.637239		0.0427474		-0.0712208			0.000421081		-18.3955	2.6456	0.266388	0.0219774
	0.699728	-0.0528229			-0.0423067					-13.4938	1.87431	0.39174	0.0157899			0.637239			0.00471865	-0.0719941				-0.0364433	-17.9655	3.07569	0.214844	0.0177249
	0.705474	-0.0228212								-13.3078	2.06033	0.356948	0.0143875			0.637239				-0.0702137			-0.00176507	-0.0390278	-17.9457	3.09549	0.212727	0.0175502
	0.702454	-0.0385912				0.0397776				-13.2985	2.06963	0.355293	0.0143208			0.637239					0.053758				-17.7885	3.25266	0.19665	0.0162239
	0.709844						-0.0571799	0.0320319	-0.0442156	-13.296	2.07208	0.354857	0.0143033			0.615252	-0.129166			-0.0708906			-0.0105701	-0.0361528	-17.5153	3.52585	0.171543	0.0141525
	0.709844					0.0297442	-0.0141863			-13.2526	2.11547	0.347241	0.0139963			0.637239		0.0535198				-0.0488097			-17.4668	3.57431	0.167436	0.0138137
	0.709844			-0.00181815						-13.2311	2.13696	0.343531	0.0138467			0.616113	-0.124111		0.00338148	-0.0770874				-0.0327152	-17.4232	3.61799	0.163818	0.0135152
	0.709844							0.00148046		-13.2296	2.13851	0.343265	0.013836			0.637239		0.040836			0.0480673				-17.3667	3.67443	0.159261	0.0131392
	0.709844				-0.0304738		-0.0116579			-13.1794	2.18874	0.334751	0.0134928			0.637239						-0.051968		-0.0530908	-17.3467	3.69442	0.157676	0.0130085
	0.709844				-0.0386213			0.00522006		-13.1064	2.26166	0.322765	0.0130097			0.612996	-0.142425					-0.0638127		-0.0506686	-17.3094	3.73175	0.154761	0.012768
	0.709844			0.00517913	-0.039044					-13.1049	2.26315	0.322525	0.013			0.637239					0.0500243			-0.038756	-17.1855	3.85562	0.145466	0.0120012
	0.709844			0.00509606		0.0389701				-13.0983	2.26981	0.321453	0.0129568			0.619856	-0.102121	0.0275457	0.01179	-0.077767					-17.1254	3.91574	0.141159	0.0116458
	0.709844					0.0380612		0.00134616		-13.0646	2.30347	0.316088	0.0127406			0.637239		0.0475344							-17.0588	3.98231	0.136538	0.0112645
	0.709844						-0.0426194	0.0223903		-12.9646	2.40351	0.300666	0.012119			0.619687	-0.103112	0.0314849		-0.0731886			-0.00505999		-16.9729	4.06824	0.130796	0.0107908
	0.709844					0.0265679	-0.0242901		-0.0370653	-12.8632	2.50491	0.285802	0.0115198			0.637239									-16.8048	4.2364	0.120248	0.00992061
	0.709844				-0.0283829		-0.0214084		-0.0376916	-12.8601	2.50798	0.285364	0.0115022			0.611532	-0.151024					-0.0552768			-16.7169	4.32428	0.115079	0.00949415
	0.6994	-0.0545379					-0.0368814			-12.8561	2.51197	0.284795	0.0114792			0.62	-0.101276				0.052955				-16.6745	4.36661	0.112669	0.00929532
	0.709844		0.0394718				-0.0527166	0.0269372		-12.8356	2.53254	0.281881	0.0113618			0.637239			0.0219239	-0.0804667			0.00667288		-16.6616	4.37959	0.11194	0.00923519
	0.702721	-0.0371964			-0.0447848				-0.0325833	-12.6979	2.67017	0.263136	0.0106062			0.637239								-0.0435752	-16.6479	4.39327	0.111177	0.00917223
	0.709844		0.035298		-0.0266352		-0.0212089			-12.6219	2.74622	0.253319	0.0102105			0.637239						-0.0422467			-16.519	4.52219	0.104236	0.00859964
	0.709844			-0.0102716	-0.0406715				-0.0385309	-12.6139	2.75419	0.25231	0.0101699			0.637239		0.0514189					-0.0388437		-16.426	4.61513	0.0995032	0.00820914
	0.709844			-0.0167451					-0.036535	-12.5828	2.78529	0.248417	0.010013			0.614608	-0.13295		0.0191738	-0.0802877			-0.00293357		-16.285	4.75615	0.0927289	0.00765025
	0.709844		0.0343135			0.0241079	-0.024331			-12.5809	2.78718	0.248182	0.0100035			0.637239							-0.0412579	-0.0498314	-16.1965	4.84464	0.0887157	0.00731916
	0.709844				-0.0428475			0.00760724	-0.0350123	-12.5709	2.79723	0.246938	0.00995337			0.619196	-0.106001	0.0424684				-0.0566			-16.1457	4.89547	0.0864893	0.00713547
	0.709844			0.00345671			-0.0322005			-12.4358	2.93234	0.230808	0.00930318			0.637239		0.0397028	0.0108513	-0.0727191			4.46027e-05		-15.8305	5.21064	0.0738795	0.00609515
	0.709844			-0.00985228		0.039035			-0.0366154	-12.4328	2.93527	0.23047	0.00928957			0.619315	-0.105301								-15.8168	5.22434	0.073375	0.00605353
	0.702044	-0.040731					-0.043778		-0.0369952	-12.4274	2.9407	0.229845	0.00926439			0.637239							-0.0337017		-15.7938	5.24736	0.0725355	0.00598427
	0.709844			-0.013311			-0.0392021		-0.0438475	-12.3962	2.97193	0.226284	0.00912084			0.621844	-0.0904431				0.049584			-0.035883	-15.6981	5.34307	0.0691461	0.00570465
	0.705542	-0.0224667				0.0413943			-0.0314242	-12.3959	2.97215	0.226259	0.00911982			0.637239					0.0439995	-0.0170212			-15.6303	5.41089	0.0668407	0.00551444
	0.709844		0.032341	-0.0109592						-12.3692	2.99889	0.223254	0.00899872			0.637239					0.0479212		-0.0147899		-15.6187	5.42244	0.0664556	0.00548267
	0.709844					0.0404945		0.00319502	-0.0328789	-12.3313	3.03684	0.219058	0.00882957			0.637239		0.0472984			0.0292276	-0.0312902			-15.5956	5.44555	0.0656923	0.0054197
	0.705976	-0.0201977	0.0296524		-0.0417532					-12.313	3.05506	0.217071	0.00874949			0.615694	-0.126574						-0.0502593	-0.0471162	-15.5902	5.45091	0.0655165	0.0054052
	0.709844		0.031991		-0.0408052			0.00510166		-12.2956	3.07246	0.215191	0.00867373			0.637239			0.0120292		0.0538253				-15.5717	5.46943	0.0649124	0.00535536
	0.709844		0.0331155	-0.00407065	-0.0396589					-12.2794	3.08867	0.213454	0.00860371			0.637239					0.0299493	-0.0336553		-0.0468525	-15.5099	5.5312	0.0629382	0.00519248
	0.709844							0.00316807	-0.0298724	-12.2639	3.10423	0.211799	0.00853701			0.613992	-0.136571						-0.0438583		-15.5055	5.5357	0.062797	0.00518083
	0.708463	-0.00720876							-0.0292632	-12.2576	3.11046	0.211141	0.00851048			0.637239		0.0444641			0.0385034		-0.0229531		-15.3637	5.67746	0.0585	0.00482632
	0.711823	0.0103329	0.0305							-12.2267	3.14144	0.207895	0.00837966			0.626109	-0.0653849	0.0333568			0.0485911				-15.3123	5.72889	0.0570147	0.00470378
	0.709844		0.0292313					0.00117906		-12.2139	3.1542	0.206573	0.00832636			0.62145	-0.092759							-0.0405851	-15.2824	5.75876	0.0561697	0.00463407
	0.709844		0.038707	-0.00648683			-0.0382857			-12.0837	3.28439	0.193555	0.00780164			0.637239			0.00466183	-0.0711138			-0.00157689	-0.0367692	-15.258	5.78311	0.0554898	0.00457798
	0.706075	-0.0196812	0.0349187				-0.0404869			-12.0797	3.28836	0.193171	0.00778617			0.637239					0.0398823		-0.0245519	-0.043456	-15.2486	5.79254	0.0552289	0.00455645
	0.709844		0.0306631	-0.00380095		0.0376727				-12.0583	3.30975	0.191116	0.00770334			0.62682	-0.0612119	0.0406009							-15.0674	5.97378	0.050444	0.00416169
	0.708528	-0.00687349	0.0287617			0.0386345				-12.046	3.32205	0.189944	0.0076561			0.614835	-0.131621				0.0327467	-0.0348286			-15.015	6.02611	0.0491413	0.00405422
	0.709844		0.0295841			0.0383335		0.00104015		-12.041	3.32708	0.189467	0.00763686			0.637239		0.0515871	0.00760756			-0.0500999			-14.9908	6.05035	0.0485492	0.00400537
	0.698423	-0.0596388			-0.0321752		-0.0162805			-11.4078	3.96026	0.138051	0.00556444			0.614767	-0.132016				0.0186288	-0.0515563		-0.0469653	-14.8759	6.16525	0.0458387	0.00378175
	0.700049	-0.0511467				0.028802	-0.0196599			-11.3426	4.02549	0.133621	0.00538588			0.637239		0.0406003	0.000838419		0.0481048				-14.8272	6.21395	0.0447361	0.00369079
	0.700776	-0.0473545					-0.0620009	0.0333339	-0.0425344	-11.2521	4.11595	0.127712	0.00514772			0.637239			-0.00329025			-0.0515744		-0.0545492	-14.8167	6.22446	0.0445017	0.00367145
	0.699834	-0.0522732			-0.0427033			0.00454646		-11.2248	4.14332	0.125977	0.00507775			0.621576	-0.0920187	0.0415819					-0.0447033		-14.7878	6.25332	0.043864	0.00361883
	0.698175	-0.0609352					-0.0495354	0.0245375		-11.2118	4.15631	0.125161	0.00504486			0.616729	-0.120494				0.0426009		-0.0258504		-14.7767	6.26448	0.04362	0.00359871
	0.699893	-0.0519639		0.00123438	-0.0424598					-11.1971	4.17099	0.124246	0.00500799			0.637239			0.011728						-14.7061	6.33506	0.0421075	0.00347392
	0.704858	-0.026036		-0.00410134						-11.1116	4.25652	0.119045	0.00479834			0.637239			-0.00770523		0.0496323			-0.0423777	-14.7022	6.33892	0.0420262	0.00346722
	0.709844			-0.0122471			-0.0559921	0.0315642	-0.0489288	-11.0989	4.26922	0.118291	0.00476796			0.637239		0.0479318	-0.00144579						-14.6747	6.36646	0.0414516	0.00341981
	0.705509	-0.0226352						0.00101763		-11.0912	4.27693	0.117835	0.0047496			0.615304	-0.128866		0.00295443	-0.0714594			-0.0104304	-0.0347281	-14.6282	6.41297	0.0404986	0.00334119
	0.709844			-0.00180015				0.00145825		-11.0161	4.35204	0.113492	0.00457455			0.612951	-0.142688		-0.00436635			-0.0633123		-0.0525994	-14.6191	6.42201	0.040316	0.00332612
	0.702737	-0.0371115		0.00203738		0.0400734				-11.0052	4.36286	0.11288	0.00454987			0.637239			0.0210582			-0.0464743			-14.6162	6.42496	0.0402567	0.00332123
	0.709844			0.00600478		0.0304888	-0.0147332			-11.0042	4.36393	0.11282	0.00454744			0.61197	-0.148451		0.0190331			-0.0588759			-14.5999	6.44128	0.0399296	0.00329424
	0.702474	-0.0384875				0.039771		0.000553154		-11.0002	4.36789	0.112597	0.00453844			0.637239			-0.0108976					-0.048644	-14.3671	6.67405	0.0355425	0.0029323
	0.709844			0.0057596	-0.0311993		-0.0121259			-10.9269	4.44122	0.108543	0.00437504			0.619465	-0.10442	0.0279867	0.0119588	-0.0748647			-0.00554441		-14.2583	6.78284	0.0336608	0.00277706
	0.709844			0.0053442	-0.0395946			0.00538026		-10.8476	4.5205	0.104324	0.004205			0.620449	-0.0986393		0.00902492		0.0530264				-14.2321	6.80902	0.0332232	0.00274095
	0.709844			0.00511307		0.0389681		0.00140606		-10.8024	4.56566	0.101995	0.00411113			0.617758	-0.114448				0.0351429		-0.0346761	-0.0417585	-14.1611	6.88007	0.0320636	0.00264529
	0.701054	-0.0459029			-0.0297976		-0.0244757		-0.0357951	-10.7934	4.57471	0.101535	0.00409256			0.637239		0.0505732	0.00320604				-0.039199		-13.897	7.14417	0.0280972	0.00231805
	0.709844			0.00565557			-0.0438846	0.0230809		-10.7102	4.65791	0.0973973	0.0039258			0.620865	-0.0961959	0.0384303			0.023773	-0.0416295			-13.8818	7.15934	0.0278849	0.00230054
	0.702528	-0.0382062				0.025993	-0.0279685		-0.0355599	-10.6997	4.66838	0.0968891	0.00390532			0.637239			0.0166653				-0.0359881		-13.7102	7.331	0.0255914	0.00211132
	0.709844			-0.0105816	-0.0268174		-0.0216338		-0.0418864	-10.6127	4.75542	0.0927628	0.003739			0.637239			-0.00743106				-0.0407509	-0.0532109	-13.7077	7.3335	0.0255595	0.00210869
	0.709844			-0.0101947		0.0249535	-0.0244756		-0.0411519	-10.6053	4.76276	0.0924232	0.00372531			0.61896	-0.107383	0.0399959	0.00916499			-0.0582561			-13.5323	7.50881	0.0234144	0.00193171
	0.699319	-0.0549626		-0.000605936			-0.036823			-10.5579	4.81019	0.090257	0.003638			0.619742	-0.102793		0.00860186						-13.5117	7.52944	0.0231741	0.0019119
	0.705074	-0.0249099	0.0368671				-0.0548776	0.0275149		-10.5363	4.83178	0.0892878	0.00359893			0.62287	-0.0844157	0.0357809			0.0366152		-0.0291077		-13.4401	7.60104	0.0223591	0.00184466
	0.70141	-0.0440438		-0.0131654	-0.0435193				-0.0374092	-10.5176	4.85045	0.0884581	0.00356549			0.637239			0.0163419		0.0413339	-0.0218302			-13.3871	7.65402	0.0217746	0.00179643
	0.709844		0.040591	-0.00444399			-0.0520088	0.0265235		-10.4783	4.8898	0.0867349	0.00349603			0.637239			0.0143351		0.0470969		-0.0170818		-13.3157	7.72548	0.0210103	0.00173338
	0.702933	-0.0360911			-0.0454374			0.00701315	-0.03312	-10.3862	4.98194	0.0828294	0.00333861			0.614477	-0.133725		0.013911				-0.0455551		-13.1875	7.85363	0.0197064	0.0016258
	0.700236	-0.0501743		-0.0167635			-0.0433149		-0.0431776	-10.3758	4.99231	0.0824014	0.00332136			0.621597	-0.0918917		-0.00954805		0.0490912			-0.0403248	-13.0783	7.96282	0.0186593	0.00153942
	0.704751	-0.0265971	0.0323914		-0.02771		-0.022484			-10.3336	5.03449	0.0806815	0.00325203			0.615524	-0.127571		-0.00917948				-0.0497039	-0.0512694	-12.9633	8.07781	0.0176168	0.00145341
	0.706438	-0.0177858		-0.0180967					-0.0360256	-10.3309	5.03715	0.0805744	0.00324772			0.637239		0.0459343	0.00580601		0.0287066	-0.0325872			-12.9238	8.11731	0.0172722	0.00142498
	0.709844			-0.0102425	-0.041468			0.00757468	-0.0390378	-10.3142	5.05386	0.079904	0.0032207			0.621125	-0.0946642		-0.0127602					-0.0464588	-12.8906	8.15051	0.0169879	0.00140152
	0.709844			-0.0167883				0.00334895	-0.0367418	-10.3001	5.06801	0.0793408	0.003198			0.637239			-0.00408243		0.0300808	-0.0330867		-0.0486345	-12.8164	8.22474	0.0163689	0.00135046
	0.709844		0.0363703	-0.00396604	-0.026019		-0.0211769			-10.259	5.10913	0.0777261	0.00313291			0.637239		0.0436348	0.0031478		0.038498		-0.0233041		-12.6653	8.3758	0.0151781	0.00125221
	0.706105	-0.0195262	0.0322325			0.0240901	-0.0258054			-10.249	5.11905	0.0773417	0.00311742			0.626107	-0.0653956	0.0330986	0.000914353		0.0486321				-12.6035	8.43761	0.0147162	0.00121411
	0.709844		0.0353355	-0.00365786		0.0234865	-0.0243001			-10.2148	5.15333	0.0760271	0.00306443			0.614944	-0.130979		0.0158233		0.0302205	-0.0393982			-12.5992	8.44192	0.0146846	0.00121149
	0.704316	-0.0288649		-0.0118945		0.0398917			-0.0357905	-10.1759	5.19219	0.0745642	0.00300547			0.637239			-0.00628525		0.0397098		-0.0241953	-0.046342	-12.5774	8.46377	0.014525	0.00119833
	0.710697	0.00445588	0.0328099	-0.010701						-10.0732	5.29493	0.0708305	0.00285497			0.626821	-0.061201	0.0409865	-0.00139816						-12.5291	8.51201	0.0141788	0.00116977
	0.709844		0.0323258	-0.0109424				0.0010121		-10.072	5.29613	0.070788	0.00285326			0.617113	-0.118233		0.0121519		0.0420019		-0.0275858		-12.245	8.79617	0.0123009	0.00101484
	0.709844			-0.00989558		0.0390308		0.00330066	-0.0368193	-10.0651	5.30301	0.070545	0.00284346			0.621516	-0.0923699	0.0404929	0.00398621				-0.0451674		-12.096	8.94513	0.011418	0.000941999
	0.705656	-0.0218708				0.0413722		0.00267299	-0.0316091	-10.0226	5.3455	0.0690622	0.0027837			0.614731	-0.132228		-0.00478164		0.0187647	-0.0509189		-0.0490527	-12.0028	9.03836	0.010898	0.000899097
	0.70859	-0.00654647						0.00301164	-0.0294728	-9.97173	5.39636	0.0673278	0.00271379			0.617595	-0.115407		-0.00800622		0.0348835		-0.0343067	-0.0454205	-11.3297	9.71146	0.00778367	0.000642162
	0.706101	-0.0195463	0.0297105		-0.0421759			0.00485823		-9.96373	5.40436	0.0670592	0.00270296			0.620616	-0.097654	0.036515	0.00757983		0.0230101	-0.0434795			-11.0515	9.98967	0.00677286	0.000558769
	0.705529	-0.0225331	0.0307724	-0.00512673	-0.0410965					-9.96324	5.40485	0.0670426	0.00270229			0.622811	-0.0847593	0.0347269	0.00386655		0.0366009		-0.029564		-10.561	10.4801	0.00529991	0.00043725
	0.709844		0.0330507	-0.00389975	-0.0401673			0.00498084		-9.9319	5.43619	0.0660002	0.00266028													Sum	12.121
	0.711875	0.0106062	0.030519					0.00138265		-9.93066	5.43743	0.0659593	0.00265863
	0.705351	-0.0234607	0.0365088	-0.00765626			-0.0399132			-9.77246	5.59563	0.060943	0.00245644
	0.708136	-0.00892071	0.0297108	-0.00425985		0.0379782				-9.6854	5.6827	0.058347	0.0023518
	0.709844		0.0306484	-0.00378476		0.0376719		0.0009848		-9.67594	5.69216	0.0580716	0.0023407
	0.708563	-0.00668841	0.0287747			0.0386232		0.000910713		-9.66342	5.70467	0.0577094	0.0023261
	0.699055	-0.0563378		-0.0160765			-0.0613563	0.0329671	-0.0484025	-9.08992	6.27817	0.0433224	0.0017462
	0.698621	-0.0586047		0.00151165	-0.0323361		-0.0163232			-9.02705	6.34105	0.0419816	0.00169216
	0.700355	-0.0495498		0.00222679		0.0291076	-0.0196918			-8.96534	6.40276	0.040706	0.00164074
	0.700025	-0.0512727		0.00142804	-0.0428852			0.00460216		-8.84365	6.52444	0.0383032	0.00154389
	0.698352	-0.060009		0.00137153			-0.0497371	0.0246723		-8.83044	6.53765	0.0380511	0.00153373
	0.704894	-0.0258497		-0.00407388				0.000901628		-8.81401	6.55409	0.0377397	0.00152118
	0.702761	-0.0369846		0.0020552		0.0400688		0.000608199		-8.62193	6.74616	0.0342838	0.00138188
	0.699589	-0.0535528		-0.0141524	-0.0279396		-0.0252884		-0.0410894	-8.55623	6.81186	0.0331759	0.00133722
	0.701028	-0.0460388		-0.0135148		0.0237351	-0.0289685		-0.0406689	-8.43903	6.92906	0.0312877	0.00126112
	0.701627	-0.0429103		-0.0130645	-0.0441672			0.00685937	-0.0378971	-8.113	7.25509	0.0265814	0.00107142
	0.704544	-0.0276749	0.0380347	-0.00578365			-0.0541961	0.0270406		-8.10656	7.26153	0.0264959	0.00106797
	0.706564	-0.0171294		-0.0180849				0.0029536	-0.0362268	-7.95949	7.4086	0.0246174	0.000992256
	0.704282	-0.0290418	0.0335627	-0.00532035	-0.0269822		-0.0225581			-7.89672	7.47138	0.0238568	0.000961596
	0.705652	-0.0218882	0.0333147	-0.00477417		0.0232768	-0.0259433			-7.80465	7.56344	0.0227835	0.000918336
	0.70443	-0.0282708		-0.0118872		0.0398707		0.00264713	-0.035971	-7.71243	7.65566	0.0217568	0.000876951
	0.710742	0.00469219	0.0328182	-0.0106689				0.00110634		-7.69106	7.67703	0.0215255	0.000867631
	0.705666	-0.0218177	0.0307859	-0.00493272	-0.0415283			0.00467712		-7.52143	7.84667	0.0197751	0.000797076
	0.708169	-0.0087456	0.0297174	-0.00423754		0.0379716		0.00080893		-7.21256	8.15553	0.0169453	0.000683015
											Sum	24.8095
	Δi = AICi − AICmin
	wi = exp(-Δi/2)/Σexp(-Δ/2)
	The corrected AIC (AICc) is used because of small number of data.
	Reliable data is defined as a sample size ≥50 individuals
